# Supplementary material for: Does Her Education Determine His Mind? Spousal Education and Gender Role Attitudes Across Macro-Contexts
Source: Research Square preprint supplement (doi:10.21203/rs.3.rs-8501837/v1), 2026-01-19
Supplement: Supplementary file 1 [file fd1abdbf291d357ddcf3439c.docx]

Table A1. Robustness Check: General Dominance Statistics by Gender

|  | High equality countries | | | |  | Low equality countries | | | |
| --- | --- | --- | --- | --- | --- | --- | --- | --- | --- |
| Predictor | Males |  | Females |  |  | Males |  | Females |  |
|  | General dom. | % | General dom. | % |  | General dom. | % | General dom. | % |
| Resp. edu. | 0.0080 | 23.47 | 0.0239 | 69.23 |  | 0.0148 | 68.18 | 0.0118 | 59.01 |
| Spouse edu. | 0.0251 | 73.88 | 0.0074 | 21.38 |  | 0.0057 | 26.23 | 0.0057 | 28.34 |
| Father edu. | 0.0005 | 1.49 | 0.0017 | 4.92 |  | 0.0007 | 3.10 | 0.0017 | 8.53 |
| Mother edu. | 0.0004 | 1.16 | 0.0015 | 4.47 |  | 0.0005 | 2.49 | 0.0008 | 4.11 |

Table A2. Robustness Check: Conditional Dominance Statistics by Gender

|  | High equality countries | | | |  | Low equality countires | | | |
| --- | --- | --- | --- | --- | --- | --- | --- | --- | --- |
| Subset size (k) | Resp. edu. | Spouse edu. | Father edu. | Mother edu. |  | Resp. edu. | Spouse edu. | Father edu. | Mother edu. |
| Panel A: Males |  |  |  |  |  |  |  |  |  |
| k = 0 | 0.0158 | 0.0328 | 0.0015 | 0.0011 |  | 0.0200 | 0.0111 | 0.0009 | 0.0016 |
| k = 1 | 0.0099 | 0.0270 | 0.0002 | 0.0001 |  | 0.0158 | 0.0068 | 0.0002 | 0.0003 |
| k = 2 | 0.0053 | 0.0225 | 0.0001 | 0.0002 |  | 0.0130 | 0.0038 | 0.0006 | 0.0001 |
| k = 3 | 0.0009 | 0.0182 | 0.0001 | 0.0001 |  | 0.0103 | 0.0009 | 0.0009 | 0.0001 |
| General dominance | 0.0080 | 0.0251 | 0.0005 | 0.0004 |  | 0.0148 | 0.0057 | 0.0007 | 0.0005 |
| Panel B: Females |  |  |  |  |  |  |  |  |  |
| k = 0 | 0.0335 | 0.0159 | 0.0056 | 0.0050 |  | 0.0185 | 0.0120 | 0.0050 | 0.0029 |
| k = 1 | 0.0251 | 0.0084 | 0.0011 | 0.0009 |  | 0.0123 | 0.0062 | 0.0012 | 0.0001 |
| k = 2 | 0.0205 | 0.0044 | 0.0001 | 0.0002 |  | 0.0093 | 0.0034 | 0.0004 | 0.0001 |
| k = 3 | 0.0168 | 0.0009 | 0.0000 | 0.0000 |  | 0.0069 | 0.0010 | 0.0002 | 0.0002 |
| General dominance | 0.0239 | 0.0074 | 0.0017 | 0.0015 |  | 0.0118 | 0.0057 | 0.0017 | 0.0008 |

Table A3. Robustness Check: Female Labor Income Share in GDP

|  | Model 1 |  |  | Model 2 |  |  | Model 3 |  |  | Model 4 |  |
| --- | --- | --- | --- | --- | --- | --- | --- | --- | --- | --- | --- |
|  | Male | Female |  | Male | Female |  | Male | Female |  | Male | Female |
| Individual-level variables |  |  |  |  |  |  |  |  |  |  |  |
| Age |  |  |  | 0.005*** | −0.006*** |  | 0.005*** | −0.006*** |  | 0.005*** | −0.007*** |
| Number of children |  |  |  | −0.003* | −0.004*** |  | −0.003* | −0.004*** |  | −0.003* | −0.004*** |
| Subjective social class |  |  |  | 0.000 | 0.002 |  | 0.000 | 0.001 |  | 0.000 | 0.002 |
| Rural (ref: urban) |  |  |  | −0.004*** | −0.004** |  | −0.005*** | −0.004** |  | −0.004** | −0.004** |
| Mother’s education |  |  |  | −0.002 | 0.002 |  | −0.002 | 0.002 |  | −0.002 | 0.002 |
| Father’s education |  |  |  | 0.001 | 0.008*** |  | 0.000 | 0.008*** |  | 0.000 | 0.008*** |
| Respondent’s education |  |  |  | 0.016*** | 0.028*** |  | 0.016*** | 0.028*** |  | 0.016*** | 0.028*** |
| Spouse’s education |  |  |  | 0.020*** | 0.008*** |  | 0.019*** | 0.008*** |  | 0.020*** | 0.007*** |
| Country-level variables |  |  |  |  |  |  |  |  |  |  |  |
| Secular values |  |  |  |  |  |  | 0.005 | 0.007 |  | 0.005 | 0.007 |
| FLIS |  |  |  |  |  |  | 0.071*** | 0.059*** |  | 0.072*** | 0.060*** |
| Cross-level interactions |  |  |  |  |  |  |  |  |  |  |  |
| Resp. edu × Secular values |  |  |  |  |  |  |  |  |  | −0.007** | −0.001 |
| Resp. edu × FLIS |  |  |  |  |  |  |  |  |  | −0.000 | 0.005** |
| Spouse edu × Secular values |  |  |  |  |  |  |  |  |  | −0.001 | −0.004* |
| Spouse edu × FLIS |  |  |  |  |  |  |  |  |  | 0.007** | 0.000 |
| σ² (Level-1) | 0.032 | 0.032 |  | 0.032 | 0.031 |  | 0.032 | 0.031 |  | 0.032 | 0.030 |
| τ₀₀ (Intercept) | 0.015*** | 0.015*** |  | 0.013*** | 0.013*** |  | 0.008*** | 0.009*** |  | 0.008*** | 0.009*** |
| τ₁₁ (Resp. education) |  |  |  | 0.0002*** | 0.0003*** |  |  |  |  |  |  |
| τ₁₁ (Spouse education) |  |  |  | 0.0002*** | 0.0002*** |  |  |  |  |  |  |
| ICC | 0.321 | 0.323 |  |  |  |  |  |  |  |  |  |
| Log-likelihood | 6,865 | 7,846 |  | 7,101 | 8,363 |  | 7,109 | 8,367 |  | 7,104 | 8,356 |

Table A4. Robustness Check: Mean Age at Childbearing

|  | Model 1 |  |  | Model 2 |  |  | Model 3 |  |  | Model 4 |  |
| --- | --- | --- | --- | --- | --- | --- | --- | --- | --- | --- | --- |
|  | Male | Female |  | Male | Female |  | Male | Female |  | Male | Female |
| Individual-level variables |  |  |  |  |  |  |  |  |  |  |  |
| Age |  |  |  | 0.005*** | −0.006*** |  | 0.005*** | −0.006*** |  | 0.005*** | −0.007*** |
| Number of children |  |  |  | −0.003* | −0.004*** |  | −0.003* | −0.004*** |  | −0.003* | −0.004*** |
| Subjective social class |  |  |  | 0.000 | 0.002 |  | 0.000 | 0.002 |  | 0.000 | 0.002 |
| Rural (ref: urban) |  |  |  | −0.004*** | −0.004** |  | −0.004** | −0.004** |  | −0.005*** | −0.004** |
| Mother’s education |  |  |  | −0.002 | 0.002 |  | −0.002 | 0.002 |  | −0.002 | 0.002 |
| Father’s education |  |  |  | 0.001 | 0.008*** |  | 0.001 | 0.008*** |  | 0.000 | 0.008*** |
| Respondent’s education |  |  |  | 0.016*** | 0.028*** |  | 0.016*** | 0.028*** |  | 0.016*** | 0.028*** |
| Spouse’s education |  |  |  | 0.020*** | 0.008*** |  | 0.020*** | 0.008*** |  | 0.019*** | 0.007*** |
| Country-level variables |  |  |  |  |  |  |  |  |  |  |  |
| Secular values |  |  |  |  |  |  | 0.041** | 0.034* |  | 0.041** | 0.034* |
| MAC |  |  |  |  |  |  | 0.021 | 0.033* |  | 0.021 | 0.033* |
| Cross-level interactions |  |  |  |  |  |  |  |  |  |  |  |
| Resp. edu × Secular values |  |  |  |  |  |  |  |  |  | −0.007*** | 0.002 |
| Resp. edu × MAC |  |  |  |  |  |  |  |  |  | −0.003 | 0.001 |
| Spouse edu × Secular values |  |  |  |  |  |  |  |  |  | 0.002 | −0.005** |
| Spouse edu × MAC |  |  |  |  |  |  |  |  |  | 0.007*** | −0.000 |
| σ² (Level-1) | 0.032 | 0.032 |  | 0.032 | 0.031 |  | 0.032 | 0.031 |  | 0.032 | 0.031 |
| τ₀₀ (Intercept) | 0.015*** | 0.015*** |  | 0.013*** | 0.013*** |  | 0.011*** | 0.011*** |  | 0.011*** | 0.011*** |
| τ₁₁ (Resp. education) |  |  |  | 0.0002*** | 0.0003*** |  |  |  |  |  |  |
| τ₁₁ (Spouse education) |  |  |  | 0.0002*** | 0.0002*** |  |  |  |  |  |  |
| ICC | 0.321 | 0.323 |  |  |  |  |  |  |  |  |  |
| Log-likelihood | 6,865 | 7,846 |  | 7,101 | 8,363 |  | 7,100 | 8,363 |  | 7,096 | 8,345 |
